# Supplementary material for: Alterations in cell cycle and MAPK pathway contribute to transition from SMF-associated acute kidney injury to fibrosis: Field direction matters
Source: Research Square preprint supplement (doi:10.21203/rs.3.rs-6392601/v1), 2025-04-25
Supplement: Supplementary file 1 [file 2b376fd890f7281a24998551.docx]

**Supplementary Materials**

**Alterations in cell cycle and MAPK pathway contribute to transition from SMF-associated acute kidney injury to fibrosis: Field direction matters**

Seong Min Lee, Saram Lee, Seong Joon Park, Kyu Hong Kim, Sunhwa Lee, Eunjin Bae, Kyung Don Yoo, Jae Wook Lee, Yon Su Kim, Daehan Kim, Joong Yull Park, Ran-Hui Cha, and Seung Hee Yang

**Supplementary Table 1. The list of antibodies used in western blot analysis, immunofluorescence assay, and immunohistochemistry**

| **Antibody** | **Vendors** | **Catalog number** | **Figure** |
| --- | --- | --- | --- |
| Collagen 1 | Santa Cruz Biotechnology, Dallas, TX, USA | sc-293182 | Figure 1c |
| Fibronectin (FN) | Abcam, Cambridge, UK | ab2413 | Figure 1c, 2a, 3f |
| Neutrophil gelatinase associated lipocalin (NGAL) | Proteintech, Rosemont, IL, USA | 26991-1-AP | Figure 1c |
| Pp38 | Cell Signaling Technology, Danvers, MA, USA | 9215S | Figure 1c, 3e |
| Vascular endothelial growth factor receptor (VEGFR) | Santa Cruz Biotechnology, Dallas, TX, USA | sc-6251 | Figure 1c |
| OGG1 | LSBio, Lynnwood, WA, USA | LS-C667682 | Figure 2a |
| Alpha smooth muscle actin (α-SMA) | Abcam, Cambridge, UK | ab32575 | Figure 2a |
| β-actin | Sigma-Aldrich, St. Louis, MO, USA | A1978 | Figure 1c, 2a, 3f |
| p38 | Abcam, Cambridge, UK | ab7952 | Figure 3e |
| Kidney injury molecule-1 (KIM-1) | Abcam, Cambridge, UK | ab233720 | Figure 3e |
| GAPDH | Cell Signaling Technology, Danvers, MA, USA | 2118S | Figure 3e |
| E-cadherin | Cell Signaling Technology, Danvers, MA, USA | 3195S | Figure 1e |
| Hypoxia inducible factor-1α (HIF-1α) | Santa Cruz Biotechnology, Dallas, TX, USA | sc-13515 | Figure 1e |
| Intercellular adhesion molecule-1 (ICAM-1) | Boster Bio, Pleasanton, CA, USA | A00171 | Figure 3c |
| F4/80 | Cell Signaling Technology, Danvers, MA, USA | 70076S | Figure 3c |
| NGAL | Santa Cruz Biotechnology, Dallas, TX, USA | sc-515876 | Figure 3c |
| Interleukin-17 receptor (IL-17R) | Santa Cruz Biotechnology, Dallas, TX, USA | sc-30175 | Figure 3c |
| p53 | Thermo Fisher Scientific, Waltham, MA, USA | MA5-12554 | Figure 3c |

**Supplementary Table 2. Primer sequences for real-time qPCR**

| **Targets (Human)** | **Sense (5’→3’)** | **Antisense (5’→3’)** |
| --- | --- | --- |
| GAPDH | GTCTCCTCTGACTTCAACAGCG | ACCACCCTGTTGCTGTAGCCAA |
| Cdk4 | CCATCAGCACAGTTCGTGAGGT | TCAGTTCGGGATGTGGCACAGA |
| Ogg1 | ATCGTACTCTAGCCTCCACTC | ACCGGAAAGATTGTCCAGAAG |
| Cyclin D1 | TCTACACCGACAACTCCATCCG | TCTGGCATTTTGGAGAGGAAGTG |
